# Supplementary material for: Bacterial Coinfection and Superinfection in Respiratory Syncytial Virus-Associated Acute Respiratory Illness: Prevalence, Pathogens, Initial Antibiotic-Prescribing Patterns and Outcomes
Source: MDPI journal article supplement (doi:10.3390/tropicalmed8030148), 2023-02-27
Supplement: s1 [file s1]

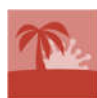

## Supplementary Materials

# Bacterial Coinfection and Superinfection in Respiratory Syncytial Virus-Associated Acute Respiratory Illness: Prevalence, Pathogens, Initial Antibiotic-Prescribing Patterns and Outcomes

Phunsup Wongsurakiat <sup>1,\*</sup>, Siwadol Sunhapanit <sup>2</sup> and Nisa Muangman <sup>3</sup>

<sup>1</sup> Division of Respiratory Diseases and Tuberculosis, Department of Medicine, Faculty of Medicine Siriraj Hospital, Mahidol University, 2 Wanglang Road, Bangkoknoi, Bangkok 10700, Thailand

<sup>2</sup> Division of Pulmonary Medicine and Pulmonary Critical Care, Faculty of Medicine, Vajira Hospital, Navamindradhiraj University, Bangkok 10300, Thailand; siwadol2530@gmail.com

<sup>3</sup> Diagnostic Division, Department of Radiology, Faculty of Medicine Siriraj Hospital, Mahidol University, 2 Wanglang Road, Bangkoknoi, Bangkok 10700, Thailand; mailtonisa@gmail.com

\* Correspondence: phunsup.won@mahidol.ac.th

**Table S1.** American Thoracic Society/Infectious Diseases Society of America criteria for defining severe community-acquired pneumonia [1].

| Major criteria                                                                                                                                                | Minor criteria                                                                                                                                                                                                                                                                                                                                                                                                                                                                                                                                                     |
|---------------------------------------------------------------------------------------------------------------------------------------------------------------|--------------------------------------------------------------------------------------------------------------------------------------------------------------------------------------------------------------------------------------------------------------------------------------------------------------------------------------------------------------------------------------------------------------------------------------------------------------------------------------------------------------------------------------------------------------------|
| <ul style="list-style-type: none"><li>Respiratory failure requiring invasive mechanical ventilation</li><li>Septic shock with need for vasopressors</li></ul> | <ul style="list-style-type: none"><li>Confusion/disorientation</li><li>Hypotension requiring aggressive fluid resuscitation</li><li>PaO<sub>2</sub>/FiO<sub>2</sub> ratio ≤ 250 mmHg</li><li>Respiratory rate ≥ 30 breaths/min or need for non-invasive ventilation</li><li>Multilobar infiltrates</li><li>Hypothermia (core temperature &lt; 36°C)</li><li>Blood urea nitrogen level ≥ 20 mg/dL</li><li>Leukopenia (white blood cell count &lt; 4,000 cells/mm<sup>3</sup>)</li><li>Thrombocytopenia (platelet count &lt; 100,000 cells/mm<sup>3</sup>)</li></ul> |
| Definition includes ≥ 1 major criterion or ≥ 3 minor criteria                                                                                                 |                                                                                                                                                                                                                                                                                                                                                                                                                                                                                                                                                                    |

**Table S2.** American Thoracic Society/Infectious Diseases Society of America Guideline Recommendations for empirical therapy for community-acquired pneumonia [1].

### Inpatients, non-ICU treatment

A nonantipseudomonal β-lactam<sup>a</sup> plus a macrolide<sup>b</sup>

A respiratory fluoroquinolone<sup>c</sup>

### Inpatients, ICU treatment

A nonantipseudomonal  $\beta$ -lactam<sup>a</sup> plus either azithromycin or a respiratory fluoroquinolone<sup>c</sup>

### If *Pseudomonas* is a concern

An antipneumococcal, antipseudomonal  $\beta$ -lactam<sup>d</sup> plus either ciprofloxacin or levofloxacin

or

The above  $\beta$ -lactam plus an aminoglycoside<sup>e</sup> and azithromycin

or

The above  $\beta$ -lactam plus an aminoglycoside<sup>e</sup> and a respiratory fluoroquinolone<sup>c</sup>

ICU: intensive care unit.

aCefotaxime, ceftriaxone, ampicillin/sulbactam, or ertapenem

bAzithromycin, clarithromycin, or erythromycin

c Levofloxacin, or moxifloxacin

d Piperacillin-tazobactam, cefepime, imipenem, or meropenem

e According to Thai guidelines for the management of adults with community-acquired pneumonia, adding an aminoglycoside is optional. An aminoglycoside may be added to the initial antibiotic regimens only if multi-drug resistant *Pseudomonas* infection is suspected.

**Table S3.** Initial antibiotics treatment and hospital-free days within 30 days after hospital admission of all patients hospitalized with respiratory syncytial virus-associated acute respiratory illness.

|                               | All Patients      |         | Bacterial coinfection |       | No bacterial coinfection |         |
|-------------------------------|-------------------|---------|-----------------------|-------|--------------------------|---------|
|                               | n = 175           |         | n = 30                |       | n = 145                  |         |
|                               | Hospital free     | p value | Hospital free         | p     | Hospital free            | p value |
|                               | days <sup>a</sup> |         | days <sup>a</sup>     | value | days <sup>a</sup>        |         |
| Initial antibiotic treatment: |                   | 0.06    |                       | -     |                          | 0.19    |
| Yes                           | 20 (10.7-23)      |         | 16 (3-20.2)           |       | 21 (13-24)               |         |

|                            |           |            |               |        |              |    |              |
|----------------------------|-----------|------------|---------------|--------|--------------|----|--------------|
|                            |           |            | (n = 150)     |        | (n = 30)     |    | (n = 120)    |
| No                         |           |            | 22 (18-25)    |        | -            |    | 22 (18-25)   |
|                            |           |            | (n = 25)      |        | (n = 0)      |    | (n = 25)     |
| Inadequate                 | initial   | antibiotic | -             | -      |              | .8 | -            |
| treatment <sup>b</sup> :   |           |            |               |        | 17 (4 to 20) |    |              |
| Yes                        |           |            |               |        | (n = 23)     |    |              |
|                            |           |            |               |        | 9 (0 to 23)  |    |              |
| No                         |           |            |               |        | (n = 7)      |    |              |
| Antibiotic classes:        |           |            |               |        |              |    |              |
| Nonantipseudomonas         | β-lactams |            |               | 0.85   | -            |    | 0.94         |
| only:                      |           |            | 20 (14-27)    |        | -            |    | 20 (14-27)   |
| Yes                        |           |            | (n = 7)       |        | (n = 0)      |    | (n = 7)      |
|                            |           |            | 20 (13-23)    |        | 16 (3-20.2)  |    | 21 (14.7-24) |
| No                         |           |            | (n = 168)     |        | (n = 30 )    |    | (n = 138)    |
| Antipseudomonas β-lactams: |           |            |               | 0.009* | 0.5          |    | 0.11         |
| Yes                        |           |            | 18.5 (5-22.2) |        | 15 (5-19)    |    | 20 (6-23)    |
|                            |           |            | (n = 58)      |        | (n = 19)     |    | (n = 39)     |
| No                         |           |            | 21 (15.5-24)  |        | 19 (0-23)    |    | 21 (16-24)   |
|                            |           |            | (n = 117)     |        | (n = 11)     |    | (n = 106)    |
| Macrolide:                 |           |            |               | 0.42   | 0.57         |    | 0.55         |
| Yes                        |           |            | 20 (9-24)     |        | 9 (0-21)     |    | 20 (12.2-24) |

|                                             |                |         |                 |      |              |         |
|---------------------------------------------|----------------|---------|-----------------|------|--------------|---------|
|                                             | (n = 79)       |         | (n = 15)        |      | (n = 64)     |         |
| No                                          | 20.5 (16-23)   |         | 17 (9-20)       |      | 21 (17-24)   |         |
|                                             | (n = 96)       |         | (n = 15)        |      | (n = 81)     |         |
| Quinolone only:                             |                | 0.63    |                 | 0.83 |              | 0.63    |
| Yes                                         | 20 (13-22)     |         | 16.5 (3.2-21.5) |      | 20 (13-22)   |         |
|                                             | (n = 19)       |         | (n = 4)         |      | (n = 15)     |         |
| No                                          | 20 (13-24)     |         | 16 (3-20.2)     |      | 21 (14.7-24) |         |
|                                             | (n = 156)      |         | (n = 26)        |      | (n = 130)    |         |
| Atypical pathogen coverage:                 |                | 0.19    |                 | 0.58 |              | 0.29    |
| Yes                                         | 20 (9.7-23.2)  |         | 12.5 (1-20.7)   |      | 20 (12.7-24) |         |
|                                             | (n = 105)      |         | (n = 20)        |      | (n = 86)     |         |
| No                                          | 21 (17-23.5)   |         | 18 (6.7-20.7)   |      | 21 (18-24)   |         |
|                                             | (n = 69)       |         | (n = 10)        |      | (n = 59)     |         |
| Guideline concordant therapy <sup>c</sup> : |                | 0.37    |                 | 0.36 |              | 0.73    |
| Yes                                         | 20 (7-24)      |         | 10.5 (1-19.7)   |      | 21 (10.5-24) |         |
|                                             | (n = 81)       |         | (n = 16)        |      | (n = 65)     |         |
| No                                          | 20 (16-23)     |         | 18 (6.7-22.2)   |      | 21 (17-23)   |         |
|                                             | (n = 94)       |         | (n = 14)        |      | (n = 80)     |         |
| Duration of initial antibiotics <5 days     | 23.5 (19-25.2) | <0.001* | 21.5 (4.7-24.7) | 0.22 | 23.5 (19-26) | <0.001* |
|                                             | (n = 58)       |         | (n = 4)         |      | (n = 54)     |         |
|                                             | 19 (8-22)      |         | 14 (3-20)       |      | 20 (12-22)   |         |

---

|                                          |           |          |          |
|------------------------------------------|-----------|----------|----------|
| Duration of initial antibiotics $\geq 5$ | (n = 117) | (n = 26) | (n = 91) |
| days                                     |           |          |          |

---

Data are presented as mean  $\pm$  SD or n (%), unless otherwise stated. <sup>a</sup>Number of days from admission to day 30 that the patient was not admitted to the hospital. <sup>b</sup>Pathogens detected were not susceptible to the antibiotics administered within 24 h of presentation. <sup>c</sup>The 2019 ATS/IDSA guidelines on the management of community-acquired pneumonia in adults. <sup>\*</sup>Statistically significant difference.

## References

1. Metlay, J.P.; Waterer, G.W.; Long, A.C.; Anzueto, A.; Brozek, J.; Crothers, K.; et al. Diagnosis and Treatment of Adults with Community-acquired Pneumonia. An Official Clinical Practice Guideline of the American Thoracic Society and Infectious Diseases Society of America. *Am. J. Respir. Crit. Care Med.* **2019**, 200(7), e45-e67.
